# Supplementary material for: Deciphering Genotype-by-Environment Interaction to Identify Target Test Environments and Stable Stripe Rust-Resistant Wheat Genotypes
Source: Research Square preprint supplement (doi:10.21203/rs.3.rs-7538887/v1), 2025-11-03
Supplement: Supplementary file 1 [file c7fdd777c5c002e09e189447.docx]

T**able S1: Plant Material used for seedling reaction test against stripe rust pathogen pathotypes**

| **S. No.** | **Accession No.** | **S. No.** | **Accession No.** | **S. No.** | **Accession No.** |
| --- | --- | --- | --- | --- | --- |
| 1 | IC530005 | 11 | IC531941 | 21 | IC536077 |
| 2 | IC530119 | 12 | IC578102 | 22 | EC573544 |
| 3 | IC529894 | 13 | IC420932 | 23 | IC536373 |
| 4 | IC530025 | 14 | EC577481 | 24 | IC535628 |
| 5 | IC128153 | 15 | IC111691 | 25 | IC542477 |
| 6 | IC533416 | 16 | IC539208 | 26 | IC128666 |
| 7 | IC445516 | 17 | EC573887 | 27 | EC534432 |
| 8 | IC47034 | 18 | EC576272 | 28 | IC531849 |
| 9 | IC529090 | 19 | IC416046 | 29 | EC464029 |
| 10 | IC529354 | 20 | IC531950 | 30 | IC531054 |
| 31 | IC445316 | 60 | EC380904 | 89 | IC296538 |
| 32 | 1C539162 | 61 | IC535470 | 90 | EC534384 |
| 33 | IC529908 | 62 | IC574775 | 91 | EC425322 |
| 34 | IC529311 | 63 | IC416043 | 92 | EC190927 |
| 35 | IC542104 | 64 | IC415825 | 93 | EC576171 |
| 36 | IC530087 | 65 | IC335768 | 94 | EC576212 |
| 37 | IC530086 | 66 | IC111745 | 95 | IC335738 |
| 38 | IC469717 | 67 | IC539593 | 96 | IC252390 |
| 39 | IC542117 | 68 | IC553065 | 97 | EC425309 |
| 40 | IC530078 | 69 | IC542898 | 98 | IC524297 |
| 41 | IC443681 | 70 | IC531277 | 99 | EC573817 |
| 42 | IC445516 | 71 | IC535428 | 100 | EC523376 |
| 43 | IC543413 | 72 | IC416040 | 101 | EC574785 |
| 44 | IC543390 | 73 | IC415882 | 102 | EC217859 |
| 45 | IC564090 | 74 | IC111693 | 103 | EC575085 |
| 46 | IC445506 | 75 | IC534494 | 104 | IC543372 |
| 47 | IC529902 | 76 | IC535498 | 105 | IC531189 |
| 48 | IC549409 | 77 | IC585640 | 106 | IC531336 |
| 49 | IC553914 | 78 | IC535692 | 107 | IC449058 |
| 50 | IC529907 | 79 | EC374953 | 108 | IC310626 |
| 51 | IC582705 | 80 | IC560681 | 109 | IC582907 |
| 52 | IC128253 | 81 | EC552096 | 110 | IC531941 |
| 53 | IC469420 | 82 | IC138426 | 111 | EC552086 |
| 54 | IC529052 | 83 | IC533941 | 112 | IC539445 |
| 55 | IC549338 | 84 | EC573599 | 113 | IC397983 |
| 56 | IC443759 | 85 | EC576009 | 114 | IC252677 |
| 57 | IC529094 | 86 | IC534662 | 115 | EC609571 |
| 58 | IC529943 | 87 | EC534495 | 116 | EC574504 |
| 59 | IC547699 | 88 | IC5391184 | 117 | IC470134 |
| 118 | IC530058 | 147 | IC534601 | 176 | IC336751 |
| 119 | IC529213 | 148 | IC445333 | 177 | IC535696 |
| 120 | IC543404 | 149 | EC576201 | 178 | IC321853 |
| 121 | IC539168 | 150 | IC582727 | 179 | IC335970 |
| 122 | IC539540 | 151 | EC573569 | 180 | IC531369 |
| 123 | IC543384 | 152 | IC416145 | 181 | IC445439 |
| 124 | EC178071504 | 153 | IC534409 | 182 | IC415861 |
| 125 | IC260939 | 154 | EC534382 | 183 | IC401979 |
| 126 | IC325997 | 155 | IC531236 | 184 | IC531790 |
| 127 | IC415945 | 156 | IC566636 | 185 | IC531211 |
| 128 | IC416018 | 157 | IC542056 | 186 | IC415880 |
| 129 | IC416120 | 158 | IC534974 | 187 | EC534451 |
| 130 | IC416143 | 159 | IC36692 | 188 | IC121129 |
| 131 | IC416415 | 160 | EC576889 | 189 | IC398067 |
| 132 | IC416170 | 161 | IC415859 | 190 | IC445400 |
| 133 | IC416171 | 162 | IC279571 | 191 | IC565812 |
| 134 | IC416244 | 163 | IC542068 | 192 | IC252705 |
| 135 | IC416252 | 164 | IC553915 | 193 | IC529309 |
| 136 | IC532207 | 165 | IC252887 | 194 | IC542012 |
| 137 | EC183963 | 166 | EC560473 | 195 | EC574259 |
| 138 | EC190996 | 167 | IC542568 | 196 | EC575907 |
| 139 | EC255091 | 168 | IC445384 | 197 | IC536474 |
| 140 | EC664190 | 169 | IC532680 | 198 | IC535487 |
| 141 | EC660682 | 170 | EC574781 | 199 | EC257883 |
| 142 | EC664198 | 171 | IC252991 | 200 | IC531927 |
| 143 | EC693321 | 172 | EC295402 | 201 | IC402010 |
| 144 | EC636264 | 173 | IC533797 | 202 | EC576952 |
| 145 | EC662236 | 174 | IC529410 | 203 | IC73571 |
| 146 | EC664239 | 175 | IC336645 | 204 | IC531380 |
| 205 | EC660850 | 234 | IC549460 | 263 | IC534047 |
| 206 | EC693306 | 235 | IC542799 | 264 | IC416320 |
| 207 | EC635697 | 236 | EC299240 | 265 | IC145954 |
| 208 | EC635701 | 237 | EC13745 | 266 | IC252714 |
| 209 | EC664206 | 238 | IC529938 | 267 | IC445494 |
| 210 | EC660874 | 239 | IC530026 | 268 | IC252660 |
| 211 | EC663916 | 240 | EC217808 | 269 | IC416046 |
| 212 | EC693322 | 241 | EC217835 | 270 | IC290211 |
| 213 | EC692262 | 242 | EC582263 | 271 | IC531950 |
| 214 | EC635577 | 243 | IC553110 | 272 | IC531529 |
| 215 | EC635865 | 244 | IC547669 | 273 | IC547588 |
| 216 | EC636232 | 245 | IC528888 | 274 | EC277014 |
| 217 | EC660681 | 246 | IC329598 | 275 | IC539531 |
| 218 | EC635750 | 247 | EC405393 | 276 | IC75246 |
| 219 | EC635690 | 248 | IC530075 | 277 | IC549385 |
| 220 | EC597947 | 249 | EC217699 | 278 | IC128174 |
| 221 | EC660684 | 250 | IC252697 | 279 | IC549499 |
| 222 | EC633778 | 251 | IC368001 | 280 | IC296312 |
| 223 | EC660680 | 252 | EC180031 | 281 | IC549520 |
| 224 | EC660948 | 253 | EC339611 | 282 | IC536488 |
| 225 | EC635663 | 254 | IC530089 | 283 | EC415809 |
| 226 | EC635569 | 255 | IC529373 | 284 | IC531501 |
| 227 | EC597921 | 256 | EC582305 | 285 | IC531257 |
| 228 | EC664238 | 257 | IC531945 | 286 | IC531586 |
| 229 | EC635576 | 258 | EC339604 | 287 | EC556482 |
| 230 | EC635653 | 259 | IC529399 | 288 | IC574475 |
| 231 | EC635715 | 260 | IC540908 | 289 | IC445366 |
| 232 | EC635777 | 261 | IC397300 | 290 | IC416352 |
| 233 | EC664223 | 262 | IC138428 | 291 | IC416409 |
| 292 | EC613049 | 321 | IC282300 | 350 | IC144917 |
| 293 | EC635684 | 322 | EC217821 | 351 | IC415875 |
| 294 | EC635704 | 323 | EC576894 | 352 | IC529202 |
| 295 | EC635859 | 324 | EC609592 | 353 | IC252419 |
| 296 | EC664291 | 325 | IC531176 | 354 | IC574851 |
| 297 | EC660969 | 326 | EC574257 | 355 | IC252369 |
| 298 | EC635608 | 327 | IC111717 | 356 | IC335768 |
| 299 | EC635767 | 328 | IC524289 | 357 | IC531432 |
| 300 | EC635657 | 329 | EC576202 | 358 | IC278687 |
| 301 | EC635664 | 330 | EC425337 | 359 | IC240802 |
| 302 | EC597933 | 331 | EC463381 | 360 | EC582254 |
| 303 | IC111939 | 332 | EC425308 | 361 | EC576298 |
| 304 | EC576744 | 333 | EC498862 | 362 | IC290213 |
| 305 | IC252974 | 334 | IC574477 | 363 | EC425289 |
| 306 | IC547602 | 335 | IC427824 | 364 | IC35076 |
| 307 | EC534511 | 336 | IC524300 | 365 | IC531542 |
| 308 | IC543372 | 337 | IC547602 | 366 | IC531579 |
| 309 | EC10860 | 338 | IC524304 | 367 | IC398091 |
| 310 | IC547647 | 339 | IC539349 | 368 | IC401976 |
| 311 | IC534364 | 340 | IC415877 | 369 | IC539316 |
| 312 | IC531277 | 341 | IC335781 | 370 | EC575036 |
| 313 | IC445414 | 342 | IC529285 | 371 | IC539486 |
| 314 | EC463426 | 343 | IC335533 | 372 | IC333151 |
| 315 | IC128187 | 344 | EC217869 | 373 | IC252542 |
| 316 | IC535678 | 345 | IC335694 | 374 | IC335788 |
| 317 | EC570328 | 346 | IC335740 | 375 | EC575881 |
| 318 | EC190879 | 347 | IC542053 | 376 | EC556510 |
| 319 | EC576195 | 348 | EC609570 | 377 | EC10814 |
| 320 | IC533606 | 349 | IC534494 | 378 | EC217766 |
| 379 | IC563970 | 400 | IC303070 | 421 | IC335683 |
| 380 | IC524017 | 401 | IC554659 | 422 | IC539529 |
| 381 | IC416079 | 402 | EC573808 | 423 | IC542052 |
| 382 | IC416142 | 403 | EC576105 | 424 | IC547646 |
| 383 | IC415860 | 404 | IC542622 | 425 | IC549334 |
| 384 | EC534415 | 405 | IC252742 | 426 | IC536221 |
| 385 | IC416040 | 406 | IC415939 | 427 | EC119958 |
| 386 | IC416108 | 407 | EC257881 | 428 | IC543059 |
| 387 | IC531201 | 408 | IC416119 | 429 | IC252623 |
| 388 | IC531377 | 409 | IC445374 | 430 | EC38102 |
| 389 | IC531884 | 410 | IC416111 | 431 | EC552096 |
| 390 | IC214796 | 411 | IC112260 | 432 | IC535279 |
| 391 | IC252609 | 412 | IC445527 | 433 | EC10968 |
| 392 | IC549527 | 413 | IC531471 | 434 | IC138447 |
| 393 | IC416146 | 414 | EC568041 | 435 | IC138426 |
| 394 | IC445407 | 415 | IC547631 | 436 | IC145938 |
| 395 | EC548666 | 416 | IC547657 | 437 | EC467937 |
| 396 | IC436069 | 417 | EC576651 | 438 | IC533733 |
| 397 | IC252441 | 418 | IC542051 | 439 | IC415955 |
| 398 | IC542050 | 419 | EC177723 | 440 | EC574784 |
| 399 | IC549436 | 420 | EC576094 | 441 | EC574756 |
|  | PBW343 (SC) |  | Agra Local (SC) |  | HD2967 (SC) |
|  | PBW752 (RC) |  | PBW725 (RC) |  |  |

**Table S2: Seedling response of wheat germplasm against 110S119 pathotype of *P. striiformis* f.sp. *tritici***

| **IT** | **Host response** | **Germplasm** | **Total No. of lines** |
| --- | --- | --- | --- |
| 0,; | HR | EC10860, IC415825, IC553065, IC534662, IC534974, EC299240, EC180031, EC339610, IC529399, EC664198, EC693621, EC664239, EC635701, EC693322, EC635577, IC0078981-B, EC0635709, EC0610955, EC0635596, EC0612505, EC0635659, EC0612508, IC0078959-A, EC0582305, EC0610947, IC0599921, EC0633780, EC0612483, IC539137, IC47034, IC529090, IC469717, IC542117, IC445516, IC543413, IC529052, IC529094, | 37 |
| 1 | R | IC111939, IC578102, IC111691, EC573887, IC535470, IC111745, IC542898, IC531277, IC535428, IC585640, IC534601, IC582727, IC534409, IC531236, IC553915, IC549460, EC582263, EC339611, IC416252, EC636264, EC662236, EC692262, EC660680, EC664223, IC CHUNGMAI, EL178071-33, EL445374, ECO635685, IC0599617, EC0635710, IC0589636, EC0635712, EC0635690, EC0635640, EC0635594, EC0635536, ECO635616, EC0635734, EC0635543, IC0591067, IC0598608, EC0582356, EC0637489, IC0145953, EC0595165, IC0591077, IC0082402-B, EC0635545, EC0635665, EC0635661, EC0582350, EC0635619, IC0591082, EC0635689, IC0589772, IC0594933, ICO598571, IC0591095, EC0635701, EC0598402, EC0612509, EC0612506, IC0591055, EC0610951, EC0521008, EC0610950, EC0610953, EC0635598, EC0105975, EC0610929, EC0612504, EC0631734, EC0610938, EC0529967, EC0610941, EC0582389, IC0406702, EC0610937, EC0635774, EC0610956, EC0530163, EC0635654, EC0612481, EC0610931, EC0610944, EC0582329, IC539155, IC529894, IC529354, IC445316, 1C539162, IC529908, IC529311, IC542104, IC530087, IC530078, IC443681, IC543390, IC564090, IC582705, IC128253, IC469420, IC443759, IC529943, IC547699, IC529213, IC539168, IC539540 | 108 |
| 2 | R-MR | EC534511, IC531941, IC539593, IC416040, IC415882, IC111693, IC535498, EC374953, IC535279, EC573599, EC534495, EC573569, IC416145, IC36692, IC415859, IC279571, IC252887, IC533797, IC336645, IC529938, EC217835, IC528888, IC252697, IC531945, IC362244, EC664206, EC635750, EC633778, EC635859, EC635608, IC566636, EC0635703, IC0598248, EC0635603, EC0635571, EC0635700, IC0599614, EC0635642, EC0635688, EC0635694, EC0635784, EC0595172, IC0078729-A, IC0467781, IC0329946, EC0582333, IC0079041B, EC0105966, IC0415507, EC0721523, IC0266138, EC0631997, EC0610939, EC0610949, IC534274, IC533416, IC553914, IC549338, IC543404, IC543384,EC576744, EC380904, IC534494, IC138426, IC416018, EC693306, EC635576, EC0530043, IC0599622, IC0595250, EC0597808, EC0635638, EC0582354, EC0635754, EC0613082, EC0105950, EC0582344, EC0610930, EC0610945, EC0635618, EC0603239, EC0612516, EC0610940, EC0610952, EC0610943, IC252642, IC335761, IC78856, IC530003, IC530119, IC128153, IC530086, IC445506, IC529902, IC549409, IC530058 | 97 |
| 3 | MR-MS | IC252974, IC547602, IC539208, EC576272, IC416046, EC552096, IC533941, EC576009, IC566636, IC529410, EC13745, IC553110, EC405393, IC362251, EC582305, EC339604, IC260939, IC415945, IC416120, IC416170, EC190996, EC255091, EC664190, EC660682, EC660850, EC663916, EC635865, EC636232, EC635690, EC635663, EC635569, EL76005, EC0598085, EC0635645, EC0635773, EC0635781, EC0635706, EC0635697, EC0635637, EC0635561, EC0635753, EC0635691, EC0635696, EC0635663, ECO595193, EC0635660, EC0598092, EC0635641, IC0589293, EC0635755, EC0635732, EC0635752, EC0635565, EC0635722, ECO635562, EC0597813, EC0635595, IC0598202, EC0635796, EC0635776, IC0598568, EC0635617, ICO598581, EC0595301, IC0598592, ICO591045, IC0598576, EC0635748, EC0635860, EC0635687, IC0598602, EC0635576, IC0598225, EC0595228, EC0635570, EC0635683, IC0031405-A, EC0635539, IC0598591, IC0594611, EC0595166, EC0595282, IC0598607, EC0105990, ICO564267, EC0582355, IC0598580, IC0598575, EC0598077, EC0530169, IC0599615, EC0598388, EC0530162, EC0529881, IC0372244, EC0582336, EC0582275, EC0612491, EC0529966, EC0610946, EC0530057, IC539292, IC535188, IC335759, IC530025, IC445516, IC529907, EC178071504 | 109 |
| 4 | S | IC543372, IC420932, EC577481, IC531950, IC574775, IC416043, IC335768, IC535692, IC560681, IC5391184, IC445333, EC576201, EC534382, IC542056, EC177783, EC576889, IC542068, EC560473, IC542568, IC445384, IC532680, EC574781, IC252991, EC295402, IC542799, IC530026, EC217808, IC329598, IC530075, EC218116, EC217699, IC368001, IC530089, IC529373, EC577584, IC416143, IC416415, IC416171, IC416244, IC532207, EC183963, EC635697, EC660874, EC660681, EC597947, EC660684, EC660948, EC597921, EC664238, EC635653, EC635715, EC635777, EC613049, EC635684, EC635704, EC664291, EC660969, EC635767, EC635664, EC597933, IC128150, IC144903, IC252794, EC0635646, IC0598573, IC0599616, EC0637484, EC0635662, IC0467789, ECO595307, EC0635757, EC0635693, ECO635605, EC0635583, IC0594610, EC0595315, EC0595254, EC0635708, EC0595231, IC0598726, EC0613054, IC0599619, EC0105960, EC0529878, EC0530188, EC0530044, IC445498 | 90 |

**Table S3: Seedling response of wheat germplasm against 238S119 pathotype of *P. striiformis* f.sp. *tritici***

| **IT** | **Host response** | **Germplasm** | **Total No. of lines** |
| --- | --- | --- | --- |
| 0,; | HR | EC10860, IC415825, IC553065, IC534662, IC534974, EC180031, EC339610, IC529399, EC664198, EC693621, EC664239, EC635701, EC693322, EC635577, IC0078981-B, EC0635709, EC0610955, EC0635596, EC0612505, EC0612508, IC0078959-A, EC0598388, EC0610947, IC0599921, EC0633780, EC0610929, EC0612504, EC0631734, EC0105966, EC0610941, EC0610956, EC0631997, EC0530057, EC0612483, IC539137, IC47034, IC529090, IC469717, IC542117, IC530078, IC443681, IC445516 | 42 |
| 1 | R | IC111691, IC535470, IC531277, IC585640, IC582727, IC36692, EC576889, IC553915, IC336645, EC299240, EC217808, EC582263, EC339611, IC362244, IC416252, EC636264, EC662236, EC692262, EC633778, EC660680, EC664223, EC635608, EC597933, EL178071-33, ECO635685, IC0599617, EC0635700, IC0599622, EC0635712, EC0635690, EC0635688, EC0635640, EC0635659, EC0635594, ECO635616, EC0635734, EC0635543, EC0637489, EC0595165, IC0591077, IC0082402-B, EC0635665, EC0582350, IC0591082, IC0594933, ICO598571, EC0635701, IC0078729-A, EC0582305, EC0530169, EC0598402, EC0612509, EC0612506, IC0591055, EC0610951, EC0610950, EC0610953, EC0105975, IC0372244,, EC0610938, EC0529967, IC0415507, EC0582389, EC0610937, EC0530163, EC0635654, EC0612491, EC0610943, EC0610949, EC0582329, IC252642, IC539292, IC539155, IC535188, IC529354, IC529908, IC529311, IC530087, IC543413, IC445506, IC582705, IC128253, IC469420, IC529052, IC529094 | 85 |
| 2 | R-MR | EC576272, IC539593, IC542898, IC416040, IC535498, EC573569, EC177783, EC217835, IC528888, IC329598, IC531945, EC339604, IC416018, EC693306, EC635750, EC635690, EC635859, IC566636, IC252794, EL445374, EC0635703, EC0635603, EC0635571, EC0635710, IC0599614, EC0635697, EC0597808, EC0635694, EC0635722, EC0635638, EC0635784, EC0635595, EC0595172, EC0635619, EC0105950, IC0467781, EC0598077, EC0582333, EC0635598, EC0635774, EC0721523, EC0610940, EC0610939, EC0610931, EC0610944, 1C539162, IC564090, IC529902, IC553914, IC529943,IC528888, IC532207, EC0635662, EC0635696, EC0635663, IC0467789, EC0635641, EC0635536, EC0635732, ECO635605, EC0597813, IC0591067, EC0635796, EC0595254, EC0635754, IC0598602, EC0595228, EC0595231, EC0635683, IC0031405-A, EC0635539, IC0598591, IC0594611, IC0589772, ICO564267, IC0079041B, EC0635618, EC0612481, IC443759, IC543404, IC539168, IC543384 | 83 |
| 3 | MR-MS | IC111939, EC576744, EC534511, IC531941, IC578102, IC420932, EC380904, IC111745, IC415882, IC535692, IC560681, IC533941, EC573599, EC576009, EC534495, EC576201, IC531236, IC279571, IC542068, IC252887, IC542568, IC533797, IC542799, EC13745, IC553110, EC218116, IC368001, IC530089, IC362251, IC416120, IC416143, IC416170, IC416171, EC183963, EC660682, EC660850, EC635865, EC636232, EC660681, EC635576, EC635653, EC635715, EC660969, EC635657, EC0530043, EC0635642, EC0635706, EC0635637, EC0635561, EC0635753, EC0635691, ECO595193, EC0635660, EC0598092, IC0589293, EC0635693, EC0635752, EC0635565, ECO635562, EC0582354, EC0635583, IC0598608, EC0582356, IC0145953, EC0635776, IC0598568, EC0635545, EC0635617, EC0595301, IC0598592, ICO591045, IC0598576, EC0635748, IC0598225, EC0635570, EC0613082, EC0635689, IC0078776-B, EC0595166, EC0595282, EC0105990, EC0582355, IC0591095, IC0598575, EC0520980, IC0599615, EC0610930, IC0329946, EC0530162, EC0610945, EC0613054, EC0529881, EC0521008, EC0603239, EC0529878, EC0530188, IC0406702, EC0582336, EC0582275, EC0612516, EC0529966, IC0266138, EC0610952, EC0530044, EC0610946, IC335761, IC335759, IC534274, IC530025, IC128153, IC533416, IC445516, IC445316, IC530086, IC543390, IC549409, IC529907, IC549338, IC547699, IC530058, IC529213, IC539540 | 121 |
| 3+,4 | S | IC252974, IC547602, IC543372, EC577481, IC539208, EC573887, IC416046, IC531950, IC574775, IC416043, IC335768, IC535428, IC111693, IC534494, EC374953, EC552096, IC535279, IC138426, IC5391184, IC534601, IC445333, IC416145, IC534409, EC534382, IC566636, IC542056, IC415859, EC560473, IC445384, IC532680, EC574781, IC252991, EC295402, IC529410, IC549460, IC529938, IC530026, EC405393, IC530075, EC217699, IC252697, IC529373, EC577584, EC582305, IC260939, IC415945, IC416415, IC416171, IC416244, EC190996, EC255091, EC664190, EC635697, EC664206, EC660874, EC663916, EC597947, EC660684, EC660948, EC635663, EC635569, EC597921, EC664238, EC635777, EC613049, EC635684, EC635704, EC664291, EC635767, EC635664, ICCHUNGMAI, IC144903, EL76005, EC0635646, IC0598248, IC0598573, EC0598085, EC0635645, EC0635773, IC0599616, EC0637484, IC0595250, EC0635781, IC0589636, ECO595307, EC0635757, EC0635755, IC0598202, IC0594610, EC0595315, EC0635708, ICO598581, EC0635860, EC0635687, EC0635576, EC0635661, IC0598607, IC0598726, IC0598580, EC0582344, IC0599619, EC0105960, IC445498, IC78856, IC530003, IC530119, IC529894, IC542104, EC178071504 | 110 |

**Table S4: Seedling response of wheat germplasm against 46S119 pathotypes of *P. striiformis* f.sp. *tritici***

| **IT** | **Host response** | **Germplasm** | **Total no. of lines** |
| --- | --- | --- | --- |
| 0,; | HR | EC10860, IC415825, IC553065, IC534662, IC534974, EC180031, EC339610, IC529399, EC664198, EC693621, EC664239, EC635701, EC693322, EC635577, IC0078981-B, EC0635709, EC0610955, EC0635596, EC0612505, ECO635616, EC0612508, IC0078959-A, EC0610947, IC0599921, EC0633780, EC0529878, EC0530188, EC0610943, EC0612483, EC0610944, IC252642, IC539137, IC47034, IC469717, IC542117, IC445516 | 36 |
| 1 | R | IC539208, EC576272, IC535470, IC539593, IC531277, IC535428, IC416040, IC585640, EC374953, IC582727, IC36692, EC177783, IC553915, IC529410, IC336645, EC299240, IC529938, IC530026, EC582263,, IC530075, IC252697, EC339611, IC530089, IC529373, IC362244, IC416143, IC416252, EC636264, EC662236, EC693306, EC692262, EC635865, EC660680, EC635653, EL178071-33, ECO635685, IC0599617, EC0635700, IC0599622, IC0595250, EC0635690, EC0635697, EC0635688, EC0635640, EC0635659, EC0635594, EC0635694, EC0635722, EC0635638 EC0635734, EC0635784, EC0635543, EC0595165, IC0591077, IC0082402-B, EC0582350, IC0591082, IC0594933, ICO598571, IC0078729-A, EC0582305, IC0467781, EC0598077, EC0598402, EC0612509, EC0612506, IC0599615, EC0598388, IC0329946, EC0582333, EC0530162, EC0610951, IC0079041B, EC0635618, EC0613054, EC0529881, EC0521008, EC0610950, EC0610953, IC0599619, EC0635598, EC0105975, EC0105960, EC0610929, EC0612504, EC0631734,, EC0105966, IC0415507, IC0406702, EC0610937, EC0582336, EC0530163 EC0635654, EC0612491, EC0610940, IC0266138, EC0612481, EC0610946, EC0610931, EC0530057, EC0582329, IC539292, IC335761, IC539155, IC535188, IC335759, IC534274, IC529894, IC530025, IC529090, 1C539162, IC529908, IC529311, IC530086, IC530078, IC443681, IC543413, IC564090, IC529902, IC549409, IC553914, IC529907, IC582705, IC128253, IC469420, IC529052, IC443759, IC529094, IC529943 | 131 |
| 2 | R-MR | IC111691, EC573887, IC416046, EC380904, IC534494, IC542898, IC535498 IC535279, IC533941, EC573569, IC531945, EC339604, IC416018, EC660874, EC663916, EC635750, EC633778, EC664223, EC635859, IC566636, EL445374, EC0635703, EC0635571, EC0635710, IC0599614, EC0635712, EC0637489, EC0595172, EC0635754, EC0635665, EC0635701, EC0105950, IC0591055, IC0372244, EC0721523, EC0612516, IC78856, IC530003, IC530119, IC128153, IC530087,IC111939, IC531941, EC576009, IC534601, IC445333, IC542056, IC542568, IC533797, IC542799, EC13745, EC217699, EC664206, EC636232, EC635690, EC635569, EC664238, EC635715, IC252794, EC0635603, EC0597808, EC0635660, EC0598092, IC0589293, EC0635693, EC0635565, EC0613082, IC0598575, EC0530169, EC0582344, EC0610945, EC0529967, EC0610941, EC0610952, EC0530044, EC0610949, IC529354, IC549338 | 86 |
| 3 | MR-MS | EC576744, IC252974, IC578102, IC420932, IC574775, IC111745, IC415882, IC111693, IC535692, IC560681, EC552096, IC138426, EC573599, EC534495, IC5391184, EC576201, IC531236, IC415859, IC542068, IC252887, EC560473, IC445384, EC574781, IC252991, IC549460, EC217808, IC553110, IC329598, EC405393, EC218116, EC577584, EC582305, IC260939, IC416120, IC532207, EC183963, EC190996, EC660850, EC660681, EC635663, EC613049, EC660969, EC635608, EC635657, EC635664, EC597933, IC0598248, IC0598573, EC0530043, EC0598085, EC0635645, EC0635773, IC0599616, EC0637484, EC0635781, EC0635706, IC0589636, EC0635637, EC0635561, EC0635662, EC0635753, EC0635691, EC0635696, EC0635663, ECO595193, IC0467789, EC0635757, EC0635641, EC0635536, EC0635732, EC0635752, ECO635605, ECO635562, EC0597813, EC0582354, EC0635583, EC0635595, IC0598202, IC0591067, IC0598608, EC0635796, IC0145953, EC0595315, EC0635776, IC0598568, EC0595254, IC0598576, EC0635570, EC0595231, EC0635683, IC0031405-A, EC0610930, EC0610938, EC0582389, EC0635774, EC0610956, EC0529966, EC0631997, IC445498, IC530058, IC529213, IC543404, IC539168, IC543384, EC178071504 | 103 |
| 3+,4 | S | IC547602, EC534511, IC543372, EC577481, IC531950, IC416043, IC335768, EC534382, IC279571, IC532680, IC415945, IC416415, IC416170, IC416171, IC416244, EC255091, EC664190, EC660682, EC635697, EC597947, EC660684, EC660948, EC635663, EC597921, EC635576, EC635777, EC635684, EC635704, EC664291, EC660969, EC635767, IC128150, IC CHUNGMAI, IC144903, EL76005, EC0635646, EC0635642, ECO595307, EC0635755, IC0594610, EC0582356, EC0635708, EC0635545, EC0635617, ICO598581, EC0595301, IC0598592, ICO591045, EC0635748, EC0635860, EC0635687, IC0598602, EC0635576, EC0635661, IC0598225, EC0595228, EC0635619, EC0635539, IC0598591, EC0635689, IC0078776-B, IC0594611, EC0595166, EC0595282, IC0598607, IC0598726, IC0589772, EC0105990, ICO564267, EC0582355, IC0591095, IC0598726, IC0598580, EC0610939, EC0582389, EC0582275, EC0610939, IC533416, IC445516, IC445316, IC542104, IC543390, IC445506, IC547699, IC539540 | 85 |

**Table: S5. Phenotypic evaluation of wheat germplasm against stripe rust during 2018-19 at PAU, Ludhiana**

| **Disease Reaction** | **GERMPLASM** | **No. of Lines** | **FRS*** | **AUDPC# (range)** |
| --- | --- | --- | --- | --- |
| Highly resistant | IC415825, IC553065, IC534662, IC534974, EC180031, IC529399, EC664198, EC693621, EC662236, EC664239,EC635701, EC693322, EC635577, EC633778, EC0635646, IC0599617, EC0635700, IC0078981-B, EC0635709, EC0635773, EC0610955, EC0635710, IC445516, EC0635781, EC0635706, EC0635690, EC0635697, EC0635753, EC0635691, EC0635696, EC0612505, EC0635596, EC0635659, EC0598092, EC0635536, EC0582354, EC0635784, EC0635796, IC0145953, IC0082402-B, EC0635545, ICO591045, EC0635860, IC0598225, EC0635611, EC0612508, IC0078959-A, IC0598575, EC0612509, EC0610947, IC0599921, EC0633780, IC0372244, IC47034, IC529090, IC469717, IC542117, IC445516, IC543413, IC531183 | 48 | 0 | 0 |
| Resistant-moderately resistant | IC111939, EC10860, IC531941, IC578102, IC111691, IC535470, IC111745, IC531277,IC416040, IC415882, IC111693, IC534494, IC535498, IC585640, EC374953, EC552096, EC576009, EC534495, IC534601, IC582727, EC573569, IC36692, IC542068, IC553915, EC295402, IC336645, EC299240, EC217835, EC582263, IC252697, EC339611, IC531945, EC339610, IC362244, IC416120, IC416170, IC416171, IC416244, IC416252, IC532207, EC190996, EC664190, EC660682, EC636264, EC660850, EC663916, EC692262, EC635865, EC636232, EC635750, EC635690, EC597947, EC660684, EC660680, EC635569, EC664238, EC635576, EC635653, EC635715, EC664223, EC635704, EC635859, EC660969, EC635608, EC597933, IC128150, IC CHUNGMAI, IC144903, EL178071-33, IC566636, IC252794, EL76005, EL445374, ECO635685, EC0635703, IC0598248, EC0635603, EC0635571, IC0598573, EC0530043, EC0598085, IC0599622, EC0635645, IC0599614, IC0599616, EC0637484, EC0635642, IC0589636, EC0635712, EC0635637, EC0597808, EC0635561, EC0635662, EC0635688, EC0635663, ECO595193, IC0467789, EC0635660, EC0635640, EC0635757, EC0635641, EC0635594, IC0589293, EC0635694, EC0635755, EC0635693, EC0635732, EC0635752, EC0635565, EC0635722, ECO635605, ECO635616, ECO635562, EC0597813, EC0635638, EC0635734, EC0635583, EC0635543, EC0635595, IC0598202, IC0591067, IC0598608, EC0582356, EC0637489, EC0595315, EC0635776, EC0595165, IC0591077, IC0598568, EC0595254, EC0635617, EC0595172, ICO598581, EC0595301, IC0598592, IC0598576, EC0635748, EC0635754, EC0635687, IC0598602, EC0635665, EC0635576, EC0635661, EC0595228, EC0635570, EC0613082, EC0595231, EC0635683, EC0582350, IC0031405-A, EC0635619, IC0591082, EC0635539, IC0598591, EC0635689, IC0078776-B, IC0594611, EC0595166, EC0595282, IC0598607, IC0589772, IC0594933, EC0105990, ICO598571, ICO564267, EC0582355, EC0635701, IC0078729-A, IC0598580, EC0582305, EC0612506, IC0599615, EC0610930, EC0610934, IC0329946, IC0591055, EC0635618, EC0613054, EC0529881, EC0521008, EC0610950, EC0610953, EC0635598, EC0105975, EC0610929, EC0612504, EC0631734, EC0603239, EC0529967, IC0415507, EC0529878, EC0610937, EC0635774, EC0610956, EC0612516, EC0530163, IC0266138, EC0610952, EC0612481, EC0610943, EC0610931, EC0612483, EC0610949, IC252642, IC445498, IC539155, IC335759, IC534274, IC78856, IC533416, IC529354, IC445316, IC529908, IC529311, IC542104, IC530087, IC530086, IC530078, IC443681, IC543390, IC564090, IC445506, IC549409, IC553914, IC582705, IC128253, IC469420, IC529052, IC549338, IC529094, IC529943, IC547699, IC530058, IC539168, IC539540, IC543384, EC76005, KRL 210, IC252794, EC187159, EC577595, IC549388, IC 128664, IC 535800, EC299216, EC444869, EC299095 | 246 | MR-10S | 1-200 |
| Moderately Susceptible-susceptible | IC252974, EC534511, EC573887, EC380904, IC539593, IC542898, IC535428, IC535279, IC533941, IC5391184, EC576201, IC416145, IC531236, IC566636, EC177783, EC576889, IC279571, EC560473, EC574781, IC549460, EC405393, EC217699, IC368001, IC530089, IC362251, EC582305, EC339604, IC260939, IC415945, IC416018, IC416415, EC183963, EC660874, EC613049, EC635767, EC635657, IC0595250, ECO595307, EC0105950, EC0598077, EC0520980, EC0598388, IC0329946, EC0582333, EC0610951, EC0610945, IC0079041B, IC0599619, EC0105966, EC0610938, EC0610941, EC0582389, EC0530188, IC0406702, EC0721523, EC0582336, EC0610956, EC0612491, EC0610940, EC0631997, EC0530044, EC0610946, EC0610939, EC0610944, EC0582329, IC539137, IC335761, IC535188, IC530003, IC530119, IC530025, IC128153, 1C539162, IC529902, IC529907, IC443759 | 82 | 20-40S | 201-400 |
| Highly Susceptible | EC576744, IC547602, EC577481, IC0598726, IC420932, IC539208, EC635777, EC0635708,, EC664291, EC576272, IC416046, EC597921, IC335768, IC531950, IC543372, IC574775, IC416043, IC535692, IC560681, IC138426, EC573599, IC445333, IC534409, EC534382, IC542056, IC415859, IC252887, IC542568, IC445384, IC532680, IC252991, IC533797, IC529410, IC542799, EC13745, IC529938, IC530026, EC217808, IC553110, IC547669, IC528888, IC530075, EC218116, IC529373, EC577584, IC416143, EC255091, EC693306, EC664206, EC660681, EC660948, EC635663, EC635664, EC635684, IC0467781, EC0530169, EC0598402, EC0582344, EC0530162, EC0105960, EC0582275, EC0529966, EC0530057, IC539292, IC529894, IC529213, EC 534545,, PBW343, HD2967, Agra local | 65 | >40S | Above 400 |

***FRS- Final rust severity, #AUDPC- Area under disease progress curve**

**Table S6: Phenotypic evaluation of wheat germplasm against stripe rust during 2019-20 at PAU, Ludhiana**

| **Disease Reaction** | **GERMPLASM** | **No. of Lines** | **FRS*** | **AUDPC# (range)** |
| --- | --- | --- | --- | --- |
| Highly Resistant | IC415825, IC534662, EC573569, IC534974, EC180031, IC445516, IC529399, EC664198, EC693621, EC662236, EC664239,EC635701, EC693322, EC635577, EC633778, EC0635646, EC0530043, EC0635709, EC0635773, EC0610955, EC0635710, EC0635781, EC0635706, EC0635690, EC0635753, EC0635691, EC0635696, EC0612505, EC0635659, EC0635732, EC0635752, EC0582354, EC0595315, IC0082402-B, EC0635596, EC0635545, ICO591045, EC0635860, IC0598602, IC0598225, EC0635611, EC0635570, EC0613082, EC0635619, EC0612508, IC0591095, IC0078959-A, IC0598575, EC0612509, EC0521008, IC0078981-B, EC0610947, IC0599921, EC0633780, EC0610929, IC0372244, EC0635654, IC445498, IC534274, IC47034, IC529090, IC469717, IC542117, IC543413, IC531183 | 49 | 0 | 0 |
| Resistant-moderately resistant | IC111939, EC10860, IC111691, IC535470, IC111745, IC553065, IC531277,IC416040, IC415882, IC111693, IC534494, IC535498, IC585640, EC374953, EC552096, EC576009, IC5391184, IC534601, IC582727, IC36692, EC576889, IC542068, IC553915, IC336645, EC299240, EC217835, EC582263, EC217699, IC252697, IC368001, EC339611, EC582305, IC531945, EC339604, EC339610, IC362244, IC416120, IC416171, IC416244, IC416252, IC532207, EC190996, EC664190, EC660682, EC636264, , EC692262, EC635865, EC635750, EC635690, EC660684, EC660680, EC635569, EC635576, EC635653, EC635715, EC664223, EC635704, EC635859, EC635608, IC128150, IC CHUNGMAI, IC144903, EL178071-33, IC566636, IC252794, EL76005, EL445374, ECO635685, EC0635703, IC0598248, EC0635603, EC0635571, IC0599617, EC0635700, IC0598573, EC0598085, IC0599622, EC0635645, IC0599614, IC0599616, EC0637484, EC0635642, IC0589636, EC0635712, EC0635697, EC0635637, EC0597808, EC0635561, EC0635662, EC0635688, EC0635663, ECO595193, IC0467789, EC0635660, EC0635640, EC0598092, EC0635757, EC0635641, EC0635594, IC0589293, EC0635694, EC0635536, EC0635755, EC0635693, EC0635565, EC0635722, ECO635605, ECO635616, ECO635562, EC0597813, EC0635638, EC0635734, EC0635784, EC0635583, EC0635543, EC0635595, IC0598202, IC0591067, IC0598608, EC0582356, EC0637489, EC0635796, IC0145953 , EC0635776, EC0595165, IC0591077, IC0598568, EC0595254, EC0635617, EC0595172, ICO598581, EC0595301, IC0598592, IC0598576, EC0635748, EC0635754, EC0635687, EC0635665, EC0635576, EC0635661, EC0595228, EC0595231, EC0635683, EC0582350, IC0031405-A, IC0591082, EC0635539, IC0598591,  EC0635689, IC0078776-B, IC0594611, EC0595166, EC0595282, IC0598607, IC0589772, IC0594933, EC0105990, ICO598571, ICO564267, EC0635701, IC0078729-A, EC0582305, EC0598077, EC0612506, EC0610930, EC0610934, IC0329946, IC0591055, EC0610945, IC0079041B, EC0635618, EC0613054, EC0529881, EC0610950, EC0610953, EC0635598, EC0105975, EC0612504, EC0631734, EC0105966, EC0603239, EC0529967, IC0415507, EC0610941, EC0529878, EC0530188, IC0406702, EC0610937, EC0635774, EC0721523, EC0610956, EC0612516, EC0530163, IC0266138, EC0610952, EC0612481, EC0631997, EC0530044, EC0610946, EC0610939, EC0610943, EC0610931, EC0612483, EC0610944, EC0610949, IC252642, IC539137, IC539155, IC535188, IC335759, IC128153, IC533416, IC529354, IC445316, 1C539162, IC542104, , IC530087, IC530078, IC443681, IC543390, IC564090, IC445506, IC549409, IC128253, IC469420, IC529052, IC549338, IC529094, IC529943, IC539168, IC543384, EC76005, KRL 210, IC252794, EC187159, EC577595, IC549388, IC 128664, IC 535800, EC299216, EC444869, EC299095 | 245 | 10MR-10S | 1-200 |
| Moderately Susceptible-susceptible | IC252974, EC534511, IC531941, IC578102, EC573887, EC380904, IC539593,, IC535428, IC535279, IC533941, EC534495, EC576201, EC177783, IC279571, EC560473, EC574781, EC295402, EC405393, IC260939, IC415945, IC416018, IC416415, IC416170, EC183963, EC660850, EC693306, EC635697, EC660874, EC663916, EC636232, EC597947, EC664238, EC613049, EC660969, EC635767, EC635657, EC597933, IC0595250, ECO595307, EC0582355, IC0598580, EC0105950, EC0520980, IC0599615, EC0598388, EC0582333, EC0530162, EC0610951, IC0599619, EC0610938, EC0582336, EC0612491, EC0610940, EC0529966, EC0582329, IC78856, IC530119, IC529894, IC530025, IC529908, IC529311, IC530086, IC529902, IC553914, IC582705, IC547699, IC530058 | 72 | 20S-40S | 201-400 |
| Highly Susceptible | EC576744, IC0598726, EC635777, IC547602, IC420932, IC539208, EC576272, EC0635708,, EC577481, IC335768, EC597921, IC416046, IC531950, IC574775, IC543372, IC416043, IC535692, IC560681, IC138426, EC573599, IC445333, IC534409, EC534382, IC542056, IC415859, IC0594610, IC252887, IC542568, IC445384, IC532680, IC252991, IC533797, IC529410, IC542799, EC13745, IC529938, IC530026, EC217808, IC553110, IC547669, IC528888, IC530075, EC218116, IC529373, EC577584, IC416143, EC255091, EC664206, EC660681, EC660948, EC635663, EC635664, EC635684, IC0467781, EC0530169, EC0598402, EC0582344, EC0105960, EC0582275, EC0530057, IC542898, IC416145, IC531236, IC566636, IC549460, IC530089, IC362251, EC664291, EC0582389, IC530003, IC529907, IC443759, EC 549435IC539292, IC529894, PBW343, HD2967, Agra local | 75 | >40 | Above 400 |

***FRS- Final rust severity, #AUDPC- Area under disease progress curve**

**Table S7: Phenotypic evaluation of wheat germplasm against stripe rust during 2020-21 at PAU, Ludhiana**

| **Disease Reaction** | **GERMPLASM** | **No. of Lines** | **FRS*** | **AUDPC# (range)** |
| --- | --- | --- | --- | --- |
| Highly Resistant | IC415825, IC553065, IC534662, EC573569, IC534974, IC36692, EC180031, IC531945, IC529399, EC664198, EC693621, EC662236, EC664239, EC635701, EC693322, EC635577, EC635576, EC635859, EC0635646, IC0078981-B, EC0530043, EC0635709, EC0635773, EC0610955, EC0637484, EC0635706, EC0635690, EC0635753, EC0612505, EC0635752, IC0598225, EC0613082, EC0612508, IC0591095, IC0078959-A, IC0598575, EC0612509, EC0612506, EC0610930, EC0610947, EC0610950, EC0610953, IC0599921, EC0633780, EC0610929, IC0372244, EC0635654, IC252642, IC445498, IC534274, IC47034, IC529090, IC469717, IC542117, IC445516, IC543413,IC46942057 | 57 | 0 | 0 |
| Resistant-moderately resistant | IC111939, EC10860, IC531941, IC578102, IC111691, EC573887, IC535470, IC111745, IC539593, IC553065, IC531277, IC535428, IC416040, IC415882, IC111693, IC534494, IC535498, IC585640, EC374953, EC552096, IC533941, EC576009, IC5391184, IC534601, IC582727, EC177783, EC576889, IC542068, IC553915, EC560473, EC295402, IC336645, EC299240, EC13745, EC217835, EC582263, EC405393, EC217699, IC252697, IC368001, EC339611, EC582305, EC339604, EC339610, IC362244, IC415945, IC416018, IC416120, IC416170, IC416171, IC416244, IC416252, IC532207, EC190996, EC664190, EC660682, EC636264, EC660850, EC693306, EC635697, EC663916, EC692262, EC635865, EC636232, EC635750, EC635690, EC597947, EC660684, EC660680, EC635569, EC664238, EC635653, EC635715, EC664223, EC613049, EC635704, EC660969, EC635608, EC597933, IC128150, ICCHUNGMAI, IC144903, EL178071-33, IC566636, IC252794, EL76005, EL445374, ECO635685, EC0635703, IC0598248, EC0635603, EC0635571, IC0599617, EC0635700, IC0078981-B, IC0598573, EC0635645, EC0635773, IC0599614, IC0599616, EC0637484, EC0635642, IC0589636, EC0635712, EC0635697, EC0635637, EC0597808, EC0635561, EC0635662, EC0635688, EC0635663, ECO595193, IC0467789, EC0635660, EC0635640, EC0598092, EC0635757, EC0635641, EC0635594, IC0589293, EC0635694, EC0635536, EC0635755, EC0635693, EC0635732, EC0635565, EC0635722, ECO635605, ECO635616, ECO635562, EC0597813, EC0635638, EC0635734, EC0635784, EC0635543, EC0635595, IC0598202, IC0591067, IC0598608, EC0582356, EC0637489, EC0635796, IC0145953, EC0595315, EC0635776, EC0595165, IC0591077, IC0598568, EC0595254, IC0082402-B, EC0635545, EC0635617, EC0595172, ICO598581, EC0595301, IC0598592, ICO591045, IC0598576, EC0635748, EC0635754, EC0635860, EC0635687, EC0635665, EC0635576, EC0635661, EC0595231, EC0635683, EC0582350, IC0591082, EC0635539, IC0598591,, EC0635689, IC0078776-B, IC0594611, EC0595166, EC0595282, IC0598607, IC0589772, IC0594933, EC0105990, ICO598571, ICO564267, EC0582355, EC0635701, IC0078729-A, IC0598580, EC0105950, EC0582305, EC0598077, IC0599615, EC0610934, IC0329946, IC0591055, EC0582333, EC0610951, EC0610945, IC0079041B, EC0635618, EC0613054, EC0529881, EC0521008, IC0599619, EC0635598, EC0105975, EC0612504, EC0631734, EC0105966, EC0610938, EC0603239, EC0529967, IC0415507, EC0610941, EC0529878, EC0530188, IC0406702, EC0610937, EC0635774, EC0721523, EC0610956, EC0612516, EC0530163, EC0612491, IC0266138, EC0610952, EC0612481, EC0631997, EC0610946, EC0610939, EC0610943, EC0610931, EC0612483, EC0610944, EC0610949, EC0582329, IC539137, IC539155, IC535188, IC335759, IC78856, IC530025, IC128153, IC533416, IC529354, IC445316, 1C539162, IC529908, IC529311, IC542104, IC530087,, IC530086, IC530078, IC443681, IC543390, IC564090, IC445506, IC549409, IC553914, IC582705,, IC128253, IC529052, IC549338, IC529094, IC529943, IC547699, IC539168, IC539540, IC543384, EC76005, KRL210, IC252794, IC464099, IC128664, IC535800, EC299216 | 274 | 10MR-10S | 1-200 |
| Moderately Susceptible-susceptible | IC252974, EC534511, EC380904, IC542898, IC560681, IC535279, EC534495, EC576201, IC416145, IC531236, IC566636, IC542056, IC415859, IC279571, IC445384, EC574781, IC252991, IC549460, IC530026, IC528888, IC329598, IC530075, IC530089, IC362251, EC577584, IC260939, IC416143, IC416415, EC183963, EC664206, EC660874, EC660681, EC635663, EC635767, EC635657, EC0598085, IC0599622, IC0595250, ECO595307, EC0595228, IC0467781, EC0530169, EC0598402, EC0520980, EC0582344, EC0598388, EC0530162, EC0582389, EC0582336, EC0582275, EC0610940, EC0529966, EC0530044, IC335761, IC530003, IC530119, IC529894, IC529902, IC529907, IC443759, IC530058, IC529213, IC543404, EC178071504 | 64 | 20S-40S | 201-400 |
| Highly Susceptible | EC576744, IC547602, IC420932, IC539208, IC0594610, IC0598726, EC576272, EC0635708, IC416046, EC664291, IC531950, EC635777, EC597921, IC335768, IC543372, IC574775, IC416043, IC535692, IC138426, EC573599, IC445333, IC534409, EC534382, IC252887, IC542568, IC532680, IC533797, IC529410, IC542799, IC529938, EC217808, IC553110, EC577481, EC218116, IC529373, EC255091, EC635684, EC660948, EC635664, EC0105960, EC0530057, IC539292, IC549388, EC 534545, IC 145670, IC401927, HD 3086, HD 2967, PBW343, Agra local | 46 | 40S-80S | Above 400 |

***FRS- Final rust severity, #AUDPC- Area under disease progress curve**

**Table S8: Phenotypic evaluation of wheat germplasm against stripe rust during 2018-19 at RRS, Gurdaspur**

| **Disease Reaction** | **Germplasm** | **No. of Lines** | **FRS*** | **AUDPC# (range)** |
| --- | --- | --- | --- | --- |
| Highly Resistant | IC535498, IC534662, IC534974, EC664239, IC542068, EC180031, EC693621, EC636264, EC662236, IC529399, , EC635701, EC635577, EC635576, EC635704, EC635859, EL445374, ECO635685, EC0635703, EC0635646, IC0599617, EC0635700, IC0078981-B, EC0530043, IC445516, EC693322, EC0635773, EC0635710, EC0635781, EC0635706, EC0635753, EC0635691, EC0635696, EC0612505, EC0635659, EC0598092, EC0582354, IC0082402-B, EC0635545, ICO591045, IC0598602, EC0610955, IC0598225, EC0635570, EC0613082, EC0635619, EC0612508, IC0591095, IC0078959-A, EC0610934, EC0635709, EC0610947, EC0610950, IC0599921, EC0633780, EC0610938, EC0603239, EC0529878, IC0406702, EC0635654, EC0610943, EC664198, IC445498, IC534274, IC47034, IC529090, EC0612483, IC469717, IC542117, IC415825, IC543413, EC0635596, IC564090, IC531183, EC576930, EC187159, EC577595, IC335778, EC 445157, EC 249887, BWL 5179, *Unnat* PBW 343, *Unnat* PBW 550 | 70 | 0 | 0 |
| Resistant to moderately resistant | IC111939, EC10860, IC531941, IC111691, IC535470, IC111745, IC539593, IC553065, IC531277, IC535428, IC416040, IC415882, IC111693, IC534494, IC585640, EC374953, EC552096, EC576009, IC534601, EC576201, IC582727, EC573569, IC36692, EC576889, IC542068, IC553915, EC295402, IC336645, EC299240, EC217835, EC582263, IC553915, IC336645, EC217835, EC582263, IC252697, IC368001, EC339611, IC531945, EC339604, EC339610, IC415945, IC416018, IC416120, IC416143, IC416415, IC416170, IC416171, IC416244, IC416252, EC183963, EC190996, EC664190, EC660682, EC660850, EC635697, EC664206, EC660874, EC663916, EC692262, EC635865, EC636232, EC660681, EC635750, EC635690, EC597947, EC660684, EC660680, EC635569, EC635653, EC635715, ECEC664223, EC613049, EC660969, EC635608, EC597933, IC128150, ICCHUNGMAI, IC144903, EL178071-33, IC566636, IC252794, EL76005, IC0598248, EC0635603, EC0635571, IC0598573, EC0598085, IC0599622, EC0635645, IC0599614, IC0599616, EC0637484, EC0635642, IC0589636, EC0635712, EC0635690, EC0635697, EC0635637, EC0597808, EC0635561, EC0635662, EC0635688, EC0635663, ECO595193, IC0467789, EC0635660, EC0635640, EC0635757, EC0635641, EC0635594, IC0589293, EC0635694, EC0635536, EC0635755, EC0635693, EC0635732, EC0635752, EC0635565, EC0635722, ECO635605, ECO635616, ECO635562, EC0597813, EC0635638, EC0635734, EC0635784, EC0635583, EC0635543, EC0635595, IC0598202, IC0591067,, IC0598608, EC0582356, EC0637489, EC0635796, IC0145953, EC0595315, EC0635776, EC0595165, IC0591077, IC0598568, EC0595254, EC0635617, EC0595172, ICO598581, EC0595301, IC0598592, IC0598576, EC0635748, EC0635754, EC0635860, EC0635687, EC0635665, EC0635576, EC0635661, EC0595228, EC0635611, EC0595231, EC0635683, EC0582350, IC0031405-A, IC0591082, EC0635539, IC0598591, EC0635689, IC0078776-B, IC0594611, EC0595166,, EC0595282, IC0598607, IC0589772, IC0594933, EC0105990, ICO598571, ICO564267, EC0635701, IC0078729-A, IC0598580, IC0598575, EC0105950, EC0582305, EC0598077, EC0520980, EC0582344, EC0612509, EC0612506, IC0599615, EC0598388, EC0610930, IC0329946, EC0530162, EC0610951, EC0610945, IC0079041B, EC0635618, EC0613054, EC0529881, EC0521008, EC0610953, IC0599619, EC0635598, EC0105975, EC0610929, EC0612504, EC0631734, EC0105966, IC0372244, EC0529967, IC0415507, EC0610941, EC0610937, EC0635774, EC0721523, EC0582336, EC0610956, EC0612516, EC0530163, EC0612491, EC0610940, IC0266138, EC0610952, EC0612481, EC0631997, EC0530044, EC0610946, EC0610939, EC0610931, , EC0610944, EC0610949, IC252642, IC539137, IC539155, IC535188, IC335759, IC529894, IC530025, IC128153, IC533416, IC529354, IC445316, IC529908, IC529311, IC542104, IC530087, IC530086, IC530078, IC443681, IC543390, IC445506, IC549409, IC582705, IC128253, IC529052, IC549338, IC529094, IC529943, IC547699, IC539168, IC539540, IC543384, EC76005, KRL 210, IC252794, Chungmai, IC464099, IC549388, IC535800, EC299216, EC 463907, EC444869, EC299095 | 256 | 10MR-10S | 1-200 |
| Moderately susceptible to susceptible | IC578102, EC573887, EC380904, IC416043, IC535279, EC534495, IC5391184, IC531236, EC177783, EC576889, IC415859, IC279571, EC560473, EC574781, EC295402, IC549460, IC542799, EC299240, EC405393, EC217699, EC582305, IC362244, IC260939, IC532207, EC255091, EC693306, EC633778, EC635663, EC664238, EC635767, EC635657, IC0595250, ECO595307, EC0582355, IC0467781, EC0530169, EC0598402, IC0591055, EC0582333, EC0582389, EC0530188, EC0582275, EC0529966, EC0582329, IC335761, IC78856, IC530119, 1C539162, IC529902, IC553914, IC529907, IC469420, IC443759, IC530058, EC178071504, IC128664, EC 534545, IC 145670 | 54 | 20-40S | 201-400 |
| Highly Susceptible | EC576744, EC0635708, IC252974, EC635684, 635777, IC547602, EC534511, IC0598726, IC0594610, IC420932, IC539208, EC576272, IC335768, EC577481, IC543372, IC416046, IC531950, IC574775, IC542898, IC535692, IC560681, IC138426, IC533941, EC573599, IC445333, IC416145, IC534409, EC534382, IC566636, IC542056, IC252887, IC542568, IC445384, EC597921, IC532680, IC252991, IC533797, IC529410, EC13745, IC529938, IC530026, EC217808, IC553110, IC528888, IC329598, IC530075, EC218116, IC530089, IC529373, IC362251, EC577584, EC660948, EC664291, EC635664, EC0105960, EC0530057, IC539292, IC530003, IC529213, IC543404, EC 299111, IC401927, IC53008, HD 2967, PBW343, Agra local | 61 | >40 | Above 400 |

**FRS- Final rust severity AUDPC- Area under disease progress curve**

**Table S9: Phenotypic evaluation of wheat germplasm against stripe rust during 2019-20 at RRS, Gurdaspur**

| **Disease reaction** | **Germplasm** | **No. of Lines** | **FRS*** | **AUDPC# (range)** |
| --- | --- | --- | --- | --- |
| Highly Resistant | IC553065, IC535498, IC534662, IC534974, IC542068, EC180031, EC693621, EC636264, EC662236, , EC635576, EC635704, EC635859, EL178071-33, EC0612483, EL445374, ECO635685, EC0635646, IC0599617, EC664239, EC0635700, IC0078981-B, EC0530043, EC0635709, IC445516, EC0635773, EC0635596, EC635577, EC0610955, EC0635710, EC0635781, EC0635706, EC0635690, EC0635697, EC0635753, EC0635691, EC0635696, EC0612505, EC0635659, EC0598092, EC0635755, ECO635616, EC0582354, EC0635784, EC0635796, IC0145953, IC0082402-B, EC0635545, IC0598592, ICO591045, EC0635860, EC693322, IC0598225, EC0635611, EC0635570, EC0635619, EC0612508, IC0078959-A, EC0610934, EC0610947, EC0610950, IC0599921, EC0633780, EC0610938, EC664198, EC0603239, EC0529878, IC0406702, EC0635654, EC0610940, EC0610943, IC445498, IC534274, IC47034, IC529090, IC469717, IC542117, IC530078, IC543413, IC564090, IC529399, IC529943, IC531183, EC576930, EC187159, EC577595, EC 445157, EC 249887, BWL 5179, *Unnat* PBW 343, *Unnat* PBW 550 | 80 | 0 | 0 |
| Resistant to moderately resistant | EC10860, IC531941, IC111691, IC535470, IC415825, IC111745, IC539593, IC531277, IC535428, IC416040, IC415882, IC111693, IC534494, IC585640, EC374953, EC552096, EC576009, IC534601, EC0530169, EC576201, EC0529966, IC582727, EC573569, IC36692, EC576889, IC542068, EC299240, EC405393, EC534495, EC573887, EC576889, EC582305, EC635701, EC664238, IC0591095, IC0595250, IC0598602, IC279571, IC335778, IC415859, IC529902, IC5391184, IC78856EC0582355, EC0582333, IC553915, EC295402, IC336645, EC299240, EC217835, EC582263, IC553915, EC295402, IC336645, EC217835, EC0582329, EC582263, IC252697, IC368001, EC339611, IC531945, EC339604, EC177783, EC339610, IC415945, IC416120, IC416143, IC416415, IC416170, IC416171, EC217699, IC416244, IC416252, EC183963, EC190996, EC664190, EC660682, EC660850, EC635697, EC664206, EC660874, EC663916, EC692262, EC635865, EC636232, EC660681, EC635750, EC0635703, EC0613082, EC635690, EC597947, EC660684, EC660680, EC635569, EC635653, EC635715, EC664223, EC613049, EC660969, EC635608, EC597933, IC128150, ICCHUNGMAI, IC144903, IC566636, IC252794, EL76005, IC0598248, EC0635603, EC0635571, IC0598573, EC0598085, IC0599622, EC0635645, IC0599614, IC0599616, EC0637484, EC0635642, IC0589636, EC0635712, EC0635637, EC0597808, EC0635561, EC0635662, EC0635688, EC0635663, IC0467789, EC0635660, EC0635640, EC0635757, EC0635641, EC0635594, IC0589293, EC0635536, EC0635693, EC0635732, EC0635752, EC0635565, EC0635722, ECO635605, ECO635562, EC0597813, EC0635638, EC0635734, EC0635784, EC0635583, EC0635543, EC0635595, IC0598202, IC0591067,, IC0598608, EC0582356, EC0637489, EC0595315, EC0635776, EC0595165, IC0591077, IC0598568, EC0595254, EC0635617, EC0595172, ICO598581, EC0595301, IC0598592, IC0598576, EC0635748, EC0635754, EC0635687, EC0635665, EC0635576, EC0635661, EC0595228, EC0595231, EC0635683, EC0582350, IC0031405-A, IC0591082, EC0635539, IC0598591, EC0635689, IC0078776-B, IC0594611, EC0595166,, EC0595282, IC0598607, IC0589772, IC0594933, EC0105990, ICO598571, ICO564267, EC0635701, IC0078729-A, IC0598575, EC0105950, EC0582305, EC0598077, EC0520980, EC0582344, EC0612509, EC0612506, IC0599615, EC0598388, EC0610930, IC0329946, EC0530162, EC0610951, EC0610945, EC0635618, EC0613054, EC0529881, EC0521008, EC0610953, IC0599619, EC0635598, EC0105975, EC0610929, EC0612504, EC0631734, EC0105966, IC0372244, EC0529967, IC0415507, EC0610937, EC0635774, EC0721523, EC0582336, EC0610956, EC0612516, EC0530163, EC0612491, EC0610940, IC0266138, EC0610952, EC0612481, EC0631997, EC0530044, EC0610946, EC0610939, EC0610931, EC0610944, EC0610949, IC252642, IC539137, IC539155, IC535188, IC335759, IC128153, IC533416, IC529354, IC445316, IC529908, IC529311, IC542104, IC530078, IC443681, IC543390, IC445506, IC582705, IC128253, IC529052, IC549338, IC529094, IC529943, IC547699, IC539168, IC539540, IC543384, EC76005, KRL 210, IC252794, Chungmai, IC464099, IC549388, IC535800, EC299216, EC 463907, EC444869, EC299095 | 257 | 10MR-10 | 1-200 |
| Moderately susceptible to susceptible | IC111939, IC578102, EC380904, IC535279, IC416145, IC531236, IC542056, EC574781, IC549460, IC542799, EC13745, EC582263, EC577584, IC362244, IC416018, IC532207, EC255091, EC633778, EC635663, EC635608, EC635767, EC635657, EC635664, ECO595193, EC0635694, IC0598580, IC0467781, EC0598402, IC0591055, IC0079041B, EC0582389, EC0530188, EC0582275, IC529894, IC530025, 1C539162, IC549409, IC553914, IC529907, IC443759, IC530058, EC76005, IC128664, EC 534545, EC 549435, UAS 415 | 42 | 20-40S | 201-400 |
| Highly Susceptible | EC576744, IC252974, EC0635708, IC0598726, EC664291, IC547602, EC534511, IC0594610, IC420932, EC635777, EC597921, IC539208, EC576272, IC335768, EC577481, IC543372, IC416046, IC531950, IC574775, IC416043, IC542898, IC535692, IC560681, IC138426, IC533941, EC573599, IC445333, IC534409, EC534382, IC566636, EC635684, IC252887, EC560473, IC542568, IC445384, IC532680, IC252991, IC533797, IC529410, IC529938, IC530026, EC217808, IC553110, IC528888, IC329598, IC530075, EC218116, IC530089, IC529373, IC362251, IC260939, EC660948, EC0105960, EC0530057, IC539292, IC335761, IC530003, IC530119, IC469420, IC529213, IC543404, EC178071504, IC 145670, EC 299111, IC401927, IC530089, HD 2967, PBW343, Agra local | 62 | >40S | Above 400 |

**FRS- Final rust severity AUDPC- Area under disease progress curve**

**Table S10: Phenotypic evaluation of wheat germplasm against stipe rust at RRS, Gurdaspur (2020-21)**

| **Disease Reaction** | **Germplasm** | **No. of Lines** | **FRS*** | **AUDPC# values (range)** |
| --- | --- | --- | --- | --- |
| Highly Resistant | IC553065, IC535498, IC534662, EC0635596, IC534974, IC542068, EC180031, IC416252, EC693621, EC636264, EC662236, EC693322, EC635576, EC635704, EL178071-33, EC0612483, EL445374, ECO635685, IC0599617, EC0635700, IC0078981-B, EC0530043, EC0635709, EC0635773, EC0610955, EC0635710, IC0599616, EC0635781, EC0635706, EC0635690, EC0635697, EC0635561, EC0635662, EC0635753, EC0635691, EC0635696, EC0635659, EC0598092, EC0635565, ECO635616, ECO635562, EC0635734, EC0582354, EC0635784, EC0635583, IC0598202, IC0591067, IC0598608, EC0635796, IC0145953, EC0595165, IC0082402-B, EC0635545, IC0598592, ICO591045, IC0598576, EC0635860, IC0598602, EC0635576, IC0598225, EC0635570, EC0635619, IC0598607, EC0612508, IC0594933, IC0591095, EC0635701, IC0078959-A, EC0610934, EC0610947, EC0610950, IC0599921, EC0633780, EC635577, EC0610938, EC0603239, EC0529878, IC0406702, EC0635654, EC0610940, EC0610943, EC0610931, IC445498, IC534274, IC47034, IC529090, IC529311, IC530087, IC469717, IC542117, EC664239, EC635701IC530078, IC445516, EC664198, IC543413, IC564090, IC549338, IC529399, IC529943, IC539168, IC531183, EC576930, EC187159, EC577595, EC 445157, EC 249887, BWL 5179, *Unnat* PBW 343, *Unnat* PBW 550 | 100 | 0 | 0 |
| Resistant to moderately resistant | EC10860, IC531941, IC111691, IC535470, IC415825, IC111745, IC539593, IC531277, IC535428, IC416040, IC415882, IC111693, IC534494, IC585640, EC374953, EC552096, EC576009, IC534601, EC0530169, EC576201, EC0529966, IC582727, EC573569, IC36692, EC576889, IC542068, EC299240, EC405393, EC534495, EC573887, EC576889, EC582305, EC664238, IC0595250, IC279571, IC335778, IC415859, IC529902, IC5391184, IC78856EC0582355, EC0582333, IC553915, EC295402, IC336645, EC299240, EC217835, EC582263, IC553915, EC295402, IC336645, EC217835, EC0582329, EC582263, IC252697, IC368001, EC339611, IC531945, EC339604, EC177783, EC339610, IC415945, IC416120, IC416143, IC416415, IC416170, IC416171, EC217699, IC416244, EC190996, EC664190, EC660682, EC660850, EC635697, EC664206, EC660874, EC663916, EC692262, EC635865, EC636232, EC660681, EC635750, EC0635703, EC0613082, EC635690, EC597947, EC660684, EC660680, EC635569, EC635653, EC635715, EC664223, EC613049, , EC635608, EC597933, IC128150, ICCHUNGMAI, IC144903, IC566636, IC252794, EL76005, IC0598248, EC0635603, EC0635571, IC0598573, EC0598085, IC0599622, EC0635645, IC0599614, EC0637484, EC0635642, IC0589636, EC0635712, EC0635637, EC0597808, EC0635662, EC0635688, EC0635663, IC0467789, EC0635660, EC0635640, EC0635757, EC0635594, IC0589293, EC0635536, EC0635693, EC0635732, EC0635752, EC0635722, EC0597813, EC0635638, EC0635784, EC0635543, EC0635595, IC0591067,, EC0582356, EC0637489, EC0595315, EC0635776, EC0595165, IC0591077, IC0598568, EC0595254, EC0635617, EC0595172, ICO598581, EC0595301, IC0598592, EC0635748, EC0635754, EC0635687, EC0635665, EC0635661, EC0595228, EC0595231, EC0635683, EC0582350, IC0031405-A, IC0591082, EC0635539, IC0598591, EC0635689, IC0078776-B, IC0594611, EC0595166,, EC0595282, IC0589772, EC0105990, ICO598571, ICO564267, EC0635701, IC0078729-A, IC0598575, EC0105950, EC0582305, EC0598077, EC0520980, EC0582344, EC0612509, EC0612506, IC0599615, EC0598388, EC0610930, IC0329946, EC0530162, EC0610951, EC0610945, EC0635618, EC0613054, EC0529881, EC0610953, IC0599619, EC0635598, EC0105975, EC0610929, EC0612504, EC0631734, EC0105966, IC0372244, EC0529967, 1C539162, EC0612505, EC582263, EC635608, EC635859, IC0079041B, IC0467781, IC0598580, IC111939, IC128664, IC362244, IC416018, IC469420, IC529894, IC529907, IC530025, IC530058, IC531236, IC532207, IC553914, IC578102I, C0415507, EC0610937, EC0635774, EC0721523, EC0582336, EC0610956, EC0612516, EC0530163, EC0612491, EC0610940, IC0266138, EC0610952, EC0612481, EC0631997, EC0530044, EC0610946, EC0610939, EC0610944, EC0610949, IC252642, IC539137, IC539155, IC535188, IC335759, IC128153, IC533416, IC529354, IC445316, IC529908, IC542104, IC530078, IC443681, IC543390, IC445506, IC582705, IC128253, IC529052, IC529094, IC529943, IC547699, IC539540, IC543384, EC76005, KRL 210, IC252794, Chungmai, IC464099, IC549388, IC535800, EC299216, EC 463907, EC444869, EC299095 | 253 | 10MR-10S | 1-200 |
| Moderately susceptible to susceptible | IC252974, IC547602, EC534511, EC380904, IC416043, IC542898, IC535692, IC560681, IC535279, IC533941, EC573599, IC416145, EC534382, IC566636, IC542056, IC542568,, IC445384, EC574781,, IC252991, IC549460, IC542799, EC13745, IC530026, IC528888, IC329598, IC530075, IC530089, IC362251, EC577584, IC260939, EC183963, EC255091, EC633778, EC660948, EC635663, EC660969, EC635767, EC635657, EC635664, EC0635603, EC0598085, ECO595307, EC0635641, ECO635605, EC0637489, EC0582389, EC0530188, IC335761, IC530003, IC549409, IC443759, IC529213, IC543404, EC178071504, EC76005, EC 534545, IC 145670 | 54 | 20-40S | 201-400 |
| Highly Susceptible | EC576744, IC420932, IC539208, EC576272, EC0635708, EC597921, IC0598726, IC0594610, EC635777, EC635684, IC416046, EC664291, IC531950, IC574775, IC335768, EC577481, IC138426, IC445333, IC534409, IC252887, EC560473, IC533797, IC532680, IC529410, IC529938, IC543372, EC217808, IC553110, EC218116, IC529373, EC0105990, EC0105960, EC0530057, IC539292, IC530119, IC401927, IC 530089, HD 2967, PBW343, Agra local | 34 | >40S | Above 400 |

**FRS- Final rust severity AUDPC- Area under disease progress curve**

**Table S11. Regression model of relative humidity with year dummy**

| **Coefficients** | **Estimate** | **Std. Error** | **p-value** |
| --- | --- | --- | --- |
| **Intercept** | 76.008 | 0.796 | <0.001 |
| **Dummy** | -1.990 | 1.379 | 0.152 |

**Table 12. Regression model of maximum temperature with year dummy**

| **Coefficients** | **Estimate** | **Std. Error** | **p-value** |
| --- | --- | --- | --- |
| **Intercept** | 18.544 | 0.428 | <0.001 |
| **Dummy** | 2.440 | 0.741 | 0.001 |
